# Supplementary material for: Mapping Dysfunctional Circuits in the Frontal Cortex Using Deep Brain Stimulation
Source: bioRxiv or medRxiv preprint supplement (doi:10.1101/2023.03.07.23286766), 2023-08-25
Supplement: Supplementary file [file media-2.pdf]

# Segregating the Frontal Cortex with Deep Brain Stimulation (Hollunder et al.): Supplementary Tables

**Table S1:** Cohort-wise summary of demographic and clinical patient characteristics.

| Disease cohort                                                   | DYT                                                                                                          |                                                                                       | PD                                                                                                              |                                           | TS                                                                                                                    | OCD                      |                                                                                                             |                              |
|------------------------------------------------------------------|--------------------------------------------------------------------------------------------------------------|---------------------------------------------------------------------------------------|-----------------------------------------------------------------------------------------------------------------|-------------------------------------------|-----------------------------------------------------------------------------------------------------------------------|--------------------------|-------------------------------------------------------------------------------------------------------------|------------------------------|
| <b>Demographic Information</b>                                   |                                                                                                              |                                                                                       |                                                                                                                 |                                           |                                                                                                                       |                          |                                                                                                             |                              |
| Cohort                                                           | San Francisco                                                                                                | Shanghai                                                                              | Berlin                                                                                                          | Würzburg                                  | Pisa/Milan                                                                                                            | Shanghai                 | London                                                                                                      | Grenoble                     |
| Surgical DBS center                                              | University of California San Francisco                                                                       | Ruijin Hospital Shanghai                                                              | Charité - Universitätsmedizin Berlin                                                                            | University Hospital Würzburg              | Fondazione IRCCS Istituto Neurologico Carlo Besta Milan                                                               | Ruijin Hospital Shanghai | National Hospital for Neurology and Neurosurgery                                                            | University Hospital Grenoble |
| N (female)                                                       | 12 (7)                                                                                                       | Main*: 44 (23);<br>Full: 58 (31)                                                      | 51 (17)                                                                                                         | 43 (12)                                   | 4 (2)                                                                                                                 | 10 (1)                   | 6 (1)                                                                                                       | 13 (9)                       |
| Age at time of surgery (mean ± SD; range; in years)              | 56.08 ± 16.06;<br>16-68                                                                                      | Main*: 39.43 ± 21.06, 7-74;<br>Full: 41.90 ± 20.60, 7-74                              | 59.98 ± 7.93;<br>42-75                                                                                          | 60.49 ± 8.23;<br>46-74                    | 34.00 ± 8.83;<br>26-46                                                                                                | 23.10 ± 9.39;<br>14-38   | 45.50 ± 10.52;<br>37-62                                                                                     | 39.15 ± 8.23;<br>27-53       |
| Disease duration at time of surgery (mean ± SD; range; in years) | 9.50 ± 9.54;<br>2-32                                                                                         | Main*: 5.94 ± 7.01, 0.5-30;<br>Full: 5.15 ± 6.36, 0.25-30                             | 10.38 ± 3.85; 5-21                                                                                              | 12.53 ± 4.46; 5-23                        | 24.25 ± 6.08; 19-33                                                                                                   | 14.8 ± 9.38; 3-30        | 24.17 ± 3.92; 20-30                                                                                         | 18.92 ± 8.96; 5-39           |
| <b>Clinical Outcome</b>                                          |                                                                                                              |                                                                                       |                                                                                                                 |                                           |                                                                                                                       |                          |                                                                                                             |                              |
| Main clinical outcome assessment                                 | BFMDRS <sup>1</sup><br>(total score; range 0-120, with higher scores corresponding to higher symptom burden) |                                                                                       | UPDRS-III <sup>2</sup><br>(total score; range 0-199, with higher scores corresponding to higher symptom burden) |                                           | YGTSS <sup>3</sup><br>(global severity score; range 0-100, with higher scores corresponding to higher symptom burden) |                          | Y-BOCS <sup>4</sup><br>(total score; range 0-40, with higher scores corresponding to higher symptom burden) |                              |
| Time of follow-up (in months)                                    | 6                                                                                                            | Main*: mean = 19.09 ± 15.60 SD, range 6-84; Full: mean = 18.00 ± 15.56 SD, range 2-84 | 12                                                                                                              | 12                                        | 6                                                                                                                     | 6                        | 3 or 6 (post-amSTN phase) <sup>†</sup>                                                                      | 12                           |
| Comparison basis for calculation of improvement                  | Pre- to postoperative                                                                                        | Pre- to postoperative                                                                 | Postoperative ON vs. OFF stimulation (ON)                                                                       | Postoperative ON vs. OFF stimulation (ON) | Pre- to postoperative                                                                                                 | Pre- to postoperative    | Pre- to postoperative                                                                                       | Pre- to postoperative        |

| values (baseline to DBS stimulation ON conditions)                           |               |                                              | dopaminergic medication) | dopaminergic medication) |               |               |               |               |
|------------------------------------------------------------------------------|---------------|----------------------------------------------|--------------------------|--------------------------|---------------|---------------|---------------|---------------|
| <b>Score at baseline (mean ± SD)</b>                                         | 16.88 ± 9.30  | Main*: 19.09 ± 17.68;<br>Full: 16.40 ± 16.57 | 38.56 ± 12.92            | 49.84 ± 12.36            | 89.25 ± 5.25  | 69.70 ± 10.19 | 36.17 ± 1.83  | 33.54 ± 3.76  |
| <b>Score at time of follow-up under stimulation ON condition (mean ± SD)</b> | 6.88 ± 5.90   | Main*: 6.02 ± 9.21;<br>Full: 5.42 ± 8.33     | 20.12 ± 8.82             | 24.47 ± 10.62            | 34.25 ± 15.97 | 26.20 ± 17.92 | 19.83 ± 10.57 | 18.92 ± 10.74 |
| <b>Rel. improvement (mean ± SD; in %)</b>                                    | 52.07 ± 41.71 | Main*: 69.90 ± 23.46;<br>Full: 65.24 ± 28.81 | 45.34 ± 23.03            | 49.46 ± 23.97            | 61.50 ± 17.81 | 62.31 ± 26.21 | 45.00 ± 29.33 | 43.59 ± 31.56 |
| <b>Abs. improvement (mean ± SD)</b>                                          | 10.00 ± 10.83 | Main*: 13.07 ± 14.72;<br>Full: 10.97 ± 13.72 | 18.44 ± 11.31            | 25.37 ± 13.30            | 55.00 ± 17.00 | 43.50 ± 18.61 | 16.33 ± 10.67 | 14.62 ± 10.75 |

#### Imaging and DBS Specifications

| Imaging modality (post-operatively) | MRI (N = 12)                                         | Main*: CT (N = 44);<br>Full: CT (N = 58)                                                                                         | MRI (N = 45),<br>CT (N = 6)                         | CT (N = 43)                                         | CT (N = 4)                         | CT (N = 10)                                             | MRI (N = 6)                     | MRI (N = 10),<br>CT (N = 3)       |
|-------------------------------------|------------------------------------------------------|----------------------------------------------------------------------------------------------------------------------------------|-----------------------------------------------------|-----------------------------------------------------|------------------------------------|---------------------------------------------------------|---------------------------------|-----------------------------------|
| <b>Electrode models</b>             | MDT 3389 (N = 12)                                    | Main*: MDT 3387 (N = 17), PINS L302 (N = 17), SR 1210 (N = 10);<br>Full: MDT 3387 (N = 22), PINS L302 (N = 26), SR 1210 (N = 10) | MDT 3389 (N = 51)                                   | MDT 3389 (N = 44)                                   | MDT 3389 (N = 4)                   | MDT 3387 (N = 2), SR 1210 (N = 7),<br>PINS L302 (N = 1) | MDT 3389 (N = 6)                | MDT 3389 (N = 14)                 |
| <b>Related citation</b>             | Ostrem et al., 2011 <sup>5</sup> ; 2016 <sup>6</sup> | Lin, 2019 <sup>7</sup> ; He, 2021 <sup>8</sup>                                                                                   | Horn et al., 2017 <sup>9</sup> ; 2019 <sup>10</sup> | Horn et al., 2017 <sup>9</sup> ; 2019 <sup>10</sup> | Vissani et al., 2019 <sup>11</sup> | Dai et al., 2022 <sup>12</sup>                          | Tyagi et al. 2019 <sup>13</sup> | Polosan et al. 2019 <sup>14</sup> |

Notes: \*The full sample of dystonia (DYT) patients from the Shanghai deep brain stimulation (DBS) center (N = 58) is based on more liberal inclusion criteria compared to the restricted sample reported on within the main manuscript (N = 44). More conservative exclusion criteria (baseline scores on the Burke-Fahn-Marsden Dystonia Rating Scale [BFMDRS] ≥ 5 and times of follow-up for postoperative assessments ≥ 6 months) were chosen to ensure sufficiently stabilized and comparable DBS effects across cohorts. Replication of results based on the full sample are reported in supplements. \*OCD patients from the London sample received bilateral DBS electrode implantations to two different target sites (four electrodes per patient) – anteromedial subthalamic nucleus (amSTN) and ventral capsule/ventral striatum (VC/VS). Analyses reported within this manuscript rely on implementation of stimulation parameters and clinical scores taken after the amSTN phase. In this case, 50% of patients were randomly attributed to either receive “pure amSTN” for the first three months post-implantation or from months four to six postoperatively. AmSTN stimulation was applied via a Medtronic (MDT) model of type 3389, while MDT 3387 leads were implanted for stimulation of the VC/VS target zone (not considered here). *Abbreviations:* CT, computed tomography; DBS, deep brain stimulation; MRI, magnetic resonance imaging; OCD, obsessive-compulsive disorder; PD, Parkinson’s disease; SD, standard deviation; SR, SceneRay; TS, Tourette’s syndrome; UPDRS-III, Unified Parkinson’s Disease Rating Scale – Part III; Y-BOCS, Yale-Brown Obsessive-Compulsive Scale; YGTSS, Yale Global Tic Severity Scale.

**Table S2:** Patient-wise demographic and clinical characteristics of the dystonia cohorts.

| <b>SAN FRANCISCO (N = 12)</b>                                                      |                                                |            |                                            |                                |                                    |                                                    |                                  |                                |                         |                                 |
|------------------------------------------------------------------------------------|------------------------------------------------|------------|--------------------------------------------|--------------------------------|------------------------------------|----------------------------------------------------|----------------------------------|--------------------------------|-------------------------|---------------------------------|
| <b>Patient Nr.</b>                                                                 | <b>Age at Surgery (within range, in years)</b> | <b>Sex</b> | <b>Disease Duration at Surgery (years)</b> | <b>BFMDRS Baseline (total)</b> | <b>BFMDRS at Follow-Up (total)</b> | <b>BFMDRS Percent Improvement at Follow-Up (%)</b> | <b>Follow-Up Period (months)</b> | <b>Symptom Sites</b>           | <b>Genetic Mutation</b> | <b>Postop. Imaging Modality</b> |
| 1                                                                                  | 41-45                                          | F          | 8                                          | 19                             | 2                                  | 89                                                 | 6                                | oromandibular, cervical        | none                    | MRI                             |
| 2                                                                                  | 46-50                                          | M          | 7                                          | 14                             | 14                                 | 0                                                  | 6                                | cervical                       | none                    | MRI                             |
| 3                                                                                  | 41-45                                          | F          | 2                                          | 34                             | 1                                  | 97                                                 | 6                                | cervical, trunk                | none                    | MRI                             |
| 4                                                                                  | 36-40                                          | F          | 9                                          | 8                              | 3                                  | 63                                                 | 6                                | cervical                       | none                    | MRI                             |
| 5                                                                                  | 51-55                                          | F          | 3                                          | 12                             | 3                                  | 75                                                 | 6                                | face, neck                     | none                    | MRI                             |
| 6                                                                                  | 46-50                                          | F          | 4                                          | 7                              | 4                                  | 43                                                 | 6                                | neck                           | none                    | MRI                             |
| 7                                                                                  | 51-55                                          | F          | 32                                         | 10                             | 4                                  | 60                                                 | 6                                | arms                           | DYT-1 mutation          | MRI                             |
| 8                                                                                  | 16-20                                          | M          | 6                                          | 11,5                           | 3,5                                | 70                                                 | 6                                | arms, neck                     | DYT-1 mutation          | MRI                             |
| 9                                                                                  | 66-70                                          | M          | 3                                          | 22                             | 12,5                               | 43                                                 | 6                                | cervical                       | none                    | MRI                             |
| 10                                                                                 | 66-70                                          | F          | 10                                         | 17                             | 5,5                                | 68                                                 | 6                                | mouth, neck, and left hand     | none                    | MRI                             |
| 11                                                                                 | 16-20                                          | M          | 4                                          | 35                             | 10                                 | 71                                                 | 6                                | right arm, neck                | DYT-1 mutation          | MRI                             |
| 12                                                                                 | 51-55                                          | M          | 26                                         | 13                             | 20                                 | -54                                                | 6                                | neck, arms                     | none                    | MRI                             |
| <b>SHANGHAI (N = 44 in the main analysis, N = 58 in the supplemental analysis)</b> |                                                |            |                                            |                                |                                    |                                                    |                                  |                                |                         |                                 |
| <b>Patient Nr.</b>                                                                 | <b>Age at Surgery (within range, in years)</b> | <b>Sex</b> | <b>Disease Duration at Surgery (years)</b> | <b>BFMDRS Baseline (total)</b> | <b>BFMDRS at Follow-Up (total)</b> | <b>Percent Improvement at Follow-Up (%)</b>        | <b>Follow-Up Period (months)</b> | <b>Dystonia Classification</b> | <b>Genetic Mutation</b> | <b>Postop. Imaging Modality</b> |
| 1                                                                                  | 61-65                                          | F          | 3                                          | 18                             | 4,5                                | 75                                                 | 12                               | segmental                      | none                    | CT                              |
| 2                                                                                  | 41-45                                          | F          | 1,5                                        | 8                              | 5,5                                | 31                                                 | 15                               | segmental                      | none                    | CT                              |
| 3                                                                                  | 26-30                                          | F          | 2                                          | 10                             | 1                                  | 90                                                 | 11                               | multi-focal                    | none                    | CT                              |
| 4                                                                                  | 21-25                                          | F          | 5,3                                        | 9                              | 2                                  | 78                                                 | 12                               | generalized                    | none                    | CT                              |
| 5                                                                                  | 56-60                                          | M          | 1,5                                        | 9                              | 1,5                                | 83                                                 | 12                               | segmental                      | none                    | CT                              |

|    |       |   |     |      |      |    |    |             |                 |    |
|----|-------|---|-----|------|------|----|----|-------------|-----------------|----|
| 6  | 56-60 | F | 1,5 | 10   | 2    | 80 | 18 | segmental   | none            | CT |
| 7  | 51-65 | F | 1,5 | 19   | 7    | 63 | 18 | multi-focal | none            | CT |
| 8  | 71-75 | M | 1   | 11   | 5    | 55 | 12 | segmental   | none            | CT |
| 9  | 66-70 | M | 10  | 6    | 0,5  | 92 | 12 | focal       | none            | CT |
| 10 | 6-10  | M | 2   | 26   | 6    | 77 | 9  | generalized | DYT-1 mutation  | CT |
| 11 | 31-35 | F | 2   | 6    | 3    | 50 | 12 | focal       | none            | CT |
| 12 | 51-55 | M | 30  | 26   | 7    | 73 | 17 | multi-focal | DYT-24 mutation | CT |
| 13 | 6-10  | M | 2   | 34   | 36   | -6 | 12 | multi-focal | none            | CT |
| 14 | 51-55 | M | 1,2 | 8    | 2    | 75 | 84 | focal       | none            | CT |
| 15 | 36-40 | F | 1   | 16,5 | 5    | 70 | 10 | segmental   | none            | CT |
| 16 | 36-40 | M | 6   | 47,5 | 1    | 98 | 8  | generalized | none            | CT |
| 17 | 66-70 | M | 10  | 19,5 | 11   | 44 | 11 | segmental   | none            | CT |
| 18 | 6-10  | M | 6   | 24   | 4    | 83 | 24 | multi-focal | none            | CT |
| 19 | 16-20 | M | 1,5 | 16   | 1,5  | 91 | 12 | generalized | none            | CT |
| 20 | 21-25 | M | 1   | 5    | 1,5  | 70 | 10 | segmental   | none            | CT |
| 21 | 66-70 | F | 8   | 8,5  | 4,5  | 47 | 48 | segmental   | none            | CT |
| 22 | 66-70 | F | 1   | 11   | 3    | 73 | 30 | segmental   | none            | CT |
| 23 | 26-30 | M | 3,5 | 19   | 5    | 74 | 6  | generalized | none            | CT |
| 24 | 41-45 | M | 3   | 10,5 | 4    | 62 | 24 | generalized | none            | CT |
| 25 | 46-50 | F | 8   | 10   | 0,5  | 95 | 24 | segmental   | none            | CT |
| 26 | 41-45 | F | 15  | 8    | 2    | 75 | 30 | generalized | none            | CT |
| 27 | 21-25 | F | 12  | 30   | 1    | 97 | 15 | multi-focal | none            | CT |
| 28 | 11-15 | M | 2   | 21   | 2    | 90 | 18 | generalized | none            | CT |
| 29 | 31-35 | M | 28  | 24   | 3    | 88 | 72 | generalized | none            | CT |
| 30 | 51-55 | F | 6   | 16,5 | 4    | 76 | 7  | generalized | none            | CT |
| 31 | 56-60 | F | 1,5 | 6    | 3    | 50 | 30 | focal       | none            | CT |
| 32 | 66-70 | F | 9   | 5    | 2,5  | 50 | 11 | segmental   | none            | CT |
| 33 | 51-55 | F | 9   | 49   | 49   | 0  | 12 | multi-focal | none            | CT |
| 34 | 21-25 | F | 21  | 20   | 13   | 35 | 24 | segmental   | none            | CT |
| 35 | 16-20 | M | 2   | 92   | 19,5 | 79 | 24 | generalized | none            | CT |

|    |       |   |     |      |     |    |    |             |      |    |
|----|-------|---|-----|------|-----|----|----|-------------|------|----|
| 36 | 71-75 | M | 6,5 | 32,5 | 17  | 48 | 12 | segmental   | none | CT |
| 37 | 36-40 | M | 1,5 | 20   | 7,5 | 63 | 18 | generalized | none | CT |
| 38 | 6-10  | M | 1   | 74   | 11  | 85 | 10 | generalized | none | CT |
| 39 | 6-10  | F | 0,5 | 16   | 1   | 94 | 13 | multi-focal | none | CT |
| 40 | 16-20 | M | 1   | 9    | 1   | 89 | 12 | multi-focal | none | CT |
| 41 | 36-40 | F | 15  | 6    | 1   | 83 | 8  | segmental   | none | CT |
| 42 | 11-15 | F | 2   | 8    | 1   | 88 | 9  | segmental   | none | CT |
| 43 | 56-60 | F | 1   | 6,5  | 1,5 | 77 | 16 | segmental   | none | CT |
| 44 | 21-25 | F | 14  | 9    | 1   | 89 | 36 | multi-focal | none | CT |

*Patients in the following list are included only in the supplemental analysis.*

|    |       |   |      |     |      |     |    |             |      |    |
|----|-------|---|------|-----|------|-----|----|-------------|------|----|
| 45 | 66-70 | F | 2,5  | 3   | 1,5  | 50  | 12 | segmental   | none | CT |
| 46 | 31-35 | M | 1,5  | 4   | 1    | 75  | 24 | segmental   | none | CT |
| 47 | 11-15 | M | 1    | 26  | 14,5 | 44  | 3  | segmental   | none | CT |
| 48 | 51-55 | F | 0,3  | 3,5 | 1,5  | 57  | 12 | segmental   | none | CT |
| 49 | 51-55 | F | 1    | 6   | 2    | 67  | 2  | focal       | none | CT |
| 50 | 66-70 | F | 8,5  | 3,5 | 3    | 14  | 7  | segmental   | none | CT |
| 51 | 46-50 | M | 3,5  | 3,5 | 1    | 71  | 60 | segmental   | none | CT |
| 52 | 31-35 | M | 3    | 28  | 3    | 89  | 4  | generalized | none | CT |
| 53 | 61-65 | M | 7    | 8   | 0,5  | 94  | 3  | segmental   | none | CT |
| 54 | 61-65 | F | 4    | 4   | 1    | 75  | 12 | segmental   | none | CT |
| 55 | 46-50 | M | 0,25 | 9   | 12   | -33 | 2  | segmental   | none | CT |
| 56 | 71-75 | F | 3    | 4,5 | 5    | -11 | 24 | focal       | none | CT |
| 57 | 26-30 | F | 0,5  | 4   | 3    | 25  | 24 | generalized | none | CT |
| 58 | 51-55 | F | 1    | 4   | 0,5  | 88  | 13 | multi-focal | none | CT |

*Abbreviations:* BFMDRS, Burke-Fahn-Marsden Dystonia Rating Scale; CT, computed tomography; F, female; M, male; MRI, magnetic resonance imaging; Nr., number; postop., postoperative.

**Table S3:** Patient-wise demographic and clinical characteristics of the Tourette's syndrome cohorts.

| <b>PISA/MILAN (N = 4)</b> |                                                |            |                                            |                       |                                     |                                                     |                                                 |                            |                                 |
|---------------------------|------------------------------------------------|------------|--------------------------------------------|-----------------------|-------------------------------------|-----------------------------------------------------|-------------------------------------------------|----------------------------|---------------------------------|
| <b>Patient Nr.</b>        | <b>Age at surgery (within range, in years)</b> | <b>Sex</b> | <b>Disease Duration at Surgery (years)</b> | <b>YGTSS Baseline</b> | <b>YGTSS at 6 mo. after Surgery</b> | <b>Percent Reduction from Baseline at 6 mo. (%)</b> | <b>Type of Tics</b>                             | <b>Comorbidities</b>       | <b>Postop. Imaging Modality</b> |
| 1                         | 26-30                                          | F          | 23                                         | 92                    | 22                                  | 76                                                  | pure motor                                      | no OCD or major depression | CT                              |
| 2                         | 26-30                                          | M          | 19                                         | 89                    | 20                                  | 78                                                  | pure motor                                      | no OCD or major depression | CT                              |
| 3                         | 31-35                                          | F          | 22                                         | 94                    | 53                                  | 44                                                  | pure motor                                      | no OCD or major depression | CT                              |
| 4                         | 46-50                                          | M          | 33                                         | 82                    | 42                                  | 49                                                  | pure motor                                      | no OCD or major depression | CT                              |
| <b>SHANGHAI (N = 10)</b>  |                                                |            |                                            |                       |                                     |                                                     |                                                 |                            |                                 |
| <b>Patient Nr.</b>        | <b>Age at Surgery (within range, in years)</b> | <b>Sex</b> | <b>Disease Duration at Surgery (years)</b> | <b>YGTSS Baseline</b> | <b>YGTSS at 6M after Surgery</b>    | <b>Percent Reduction from Baseline at 6 mo. (%)</b> | <b>Motor Tics: Body Regions Involved</b>        | <b>Comorbidities</b>       | <b>Postop. Imaging Modality</b> |
| 1                         | 16-20                                          | M          | 11                                         | 75                    | 24                                  | 68                                                  | neck, shoulders, legs, feet                     | none                       | CT                              |
| 2                         | 11-15                                          | M          | 9                                          | 71                    | 4                                   | 94                                                  | eyes, neck                                      | none                       | CT                              |
| 3                         | 11-15                                          | M          | 3                                          | 68                    | 6                                   | 91                                                  | arms, trunk, legs                               | none                       | CT                              |
| 4                         | 36-40                                          | M          | 30                                         | 71                    | 61                                  | 14                                                  | nose, mouth, neck, arms, hands, legs            | anxiety                    | CT                              |
| 5                         | 16-20                                          | F          | 12                                         | 59                    | 8                                   | 86                                                  | eyes, nose, mouth, neck, shoulders, arms, hands | OCD, depression            | CT                              |
| 6                         | 36-40                                          | M          | 27                                         | 69                    | 33                                  | 52                                                  | eyes, mouth, neck, shoulders, arms, hands       | none                       | CT                              |
| 7                         | 16-20                                          | M          | 6                                          | 76                    | 36                                  | 53                                                  | eyes, mouth, neck, hands, legs                  | none                       | CT                              |
| 8                         | 26-30                                          | M          | 16                                         | 63                    | 17                                  | 73                                                  | eyes, nose, shoulders, trunk                    | OCD                        | CT                              |
| 9                         | 26-30                                          | M          | 25                                         | 91                    | 35                                  | 62                                                  | neck, shoulders, arms, legs, feet               | OCD                        | CT                              |
| 10                        | 11-15                                          | M          | 9                                          | 54                    | 38                                  | 30                                                  | eyes, mouth, neck                               | none                       | CT                              |

*Abbreviations:* CT, computed tomography; F, female; M, male; mo., months; Nr., number; OCD, obsessive-compulsive disorder; postop., postoperative; YGTSS, Yale Global Tic Severity Scale.

**Table S4:** Demographic and clinical patient characteristics of the Parkinson's disease cohorts.

| Pat. Nr.               | Age at surgery (within range, in years) | Sex | Disease Duration at Surgery (years) | PD Phenotype* | UPDRS III Total Preop. Baseline |                 | UPDRS III Total Postop. (STIM OFF at 12 Mo.) | UPDRS III Total Postop. (STIM ON at 12 mo.) | UPDRS III Total Percent Improvement ON vs OFF STIM at 12 mo. postop. (%) |             | LEDD Baseline (OFF DBS) | LEDD at 12 mo. Postop. (ON DBS) | LEDD Reduction (%) | Percent Improvement Levodopa Response | Postop. Imaging Modality |
|------------------------|-----------------------------------------|-----|-------------------------------------|---------------|---------------------------------|-----------------|----------------------------------------------|---------------------------------------------|--------------------------------------------------------------------------|-------------|-------------------------|---------------------------------|--------------------|---------------------------------------|--------------------------|
|                        |                                         |     |                                     |               | (OFF medication)                | (ON Medication) |                                              |                                             | STIM at 12                                                               | mo. postop. |                         |                                 |                    |                                       |                          |
| <b>BERLIN (N = 51)</b> |                                         |     |                                     |               |                                 |                 |                                              |                                             |                                                                          |             |                         |                                 |                    |                                       |                          |
| 1                      | 71-55                                   | F   | 8                                   | 1             | 20                              | 10              | 29                                           | 30                                          | -3                                                                       | 968         | 498                     | 49                              | 50                 | MRI                                   |                          |
| 2                      | 56-60                                   | M   | 10                                  | 1             | 33                              | 20              | 41                                           | 23                                          | 44                                                                       | 900         | 725                     | 19                              | 39                 | MRI                                   |                          |
| 3                      | 66-70                                   | F   | 12                                  | 1             | n/a                             | n/a             | 54                                           | 36                                          | 33                                                                       | 1000        | 400                     | 60                              | 31                 | MRI                                   |                          |
| 4                      | 61-65                                   | M   | 11                                  | 1             | 33                              | 11              | 45                                           | 30                                          | 33                                                                       | 855         | 640                     | 25                              | 67                 | MRI                                   |                          |
| 5                      | 66-70                                   | M   | 6                                   | 1             | 31                              | 18              | 37                                           | 19                                          | 49                                                                       | 1035        | 1115                    | -8                              | 42                 | MRI                                   |                          |
| 6                      | 46-50                                   | M   | 5                                   | 1             | 29                              | 3               | 39                                           | 15                                          | 62                                                                       | 610         | 0                       | 100                             | 90                 | MRI                                   |                          |
| 7                      | 56-60                                   | F   | 7                                   | 1             | n/a                             | n/a             | 52                                           | 29                                          | 44                                                                       | 1150        | 100                     | 91                              | 72                 | MRI                                   |                          |
| 8                      | 71-75                                   | F   | 18                                  | 1             | n/a                             | n/a             | 13                                           | 11                                          | 15                                                                       | 1500        | 650                     | 57                              | 26                 | CT                                    |                          |
| 9                      | 66-70                                   | M   | 12                                  | 1             | n/a                             | n/a             | 40                                           | 20                                          | 50                                                                       | 1650        | 475                     | 71                              | 54                 | CT                                    |                          |
| 10                     | 61-65                                   | M   | 11                                  | 1             | n/a                             | n/a             | 44                                           | 26                                          | 41                                                                       | 900         | 600                     | 33                              | 46                 | MRI                                   |                          |
| 11                     | 66-70                                   | M   | 9                                   | 1             | 27                              | 9               | 36                                           | 22                                          | 39                                                                       | 1275        | 1305                    | -2                              | 67                 | MRI                                   |                          |
| 12                     | 51-55                                   | M   | 7                                   | 1             | 36                              | 20              | 46                                           | 30                                          | 35                                                                       | 1620        | 1000                    | 38                              | 44                 | MRI                                   |                          |
| 13                     | 66-70                                   | M   | 14                                  | 1             | 25                              | 14              | 28                                           | 17                                          | 39                                                                       | 1640        | 1398                    | 15                              | 44                 | CT                                    |                          |
| 14                     | 66-70                                   | F   | n/a                                 | 1             | n/a                             | n/a             | 27                                           | 29                                          | -7                                                                       | n/a         | n/a                     | n/a                             | n/a                | MRI                                   |                          |
| 15                     | 61-65                                   | M   | 11                                  | 1             | 16                              | 9               | 28                                           | 13                                          | 54                                                                       | 3065        | 400                     | 87                              | 44                 | MRI                                   |                          |
| 16                     | 66-70                                   | M   | 10                                  | 1             | 32                              | 17              | 29                                           | 19                                          | 34                                                                       | 1170        | 780                     | 33                              | 47                 | MRI                                   |                          |
| 17                     | 51-55                                   | M   | 8                                   | 1             | n/a                             | n/a             | 24                                           | 9                                           | 63                                                                       | 1000        | 267                     | 73                              | 85                 | MRI                                   |                          |
| 18                     | 56-60                                   | M   | 7                                   | 1             | n/a                             | n/a             | 32,5                                         | 8                                           | 75                                                                       | 600         | 50                      | 92                              | 79                 | CT                                    |                          |
| 19                     | 71-75                                   | M   | 9                                   | 1             | n/a                             | n/a             | 27                                           | 20                                          | 26                                                                       | 1300        | 700                     | 46                              | 43                 | MRI                                   |                          |
| 20                     | 71-75                                   | F   | 5                                   | 1             | n/a                             | n/a             | 24                                           | 25                                          | -4                                                                       | 650         | 700                     | -8                              | 44                 | MRI                                   |                          |
| 21                     | 51-55                                   | M   | 16                                  | 1             | 36                              | 16              | 33                                           | 6                                           | 82                                                                       | 700         | 375                     | 46                              | 56                 | MRI                                   |                          |

|    |       |   |    |   |     |     |    |    |    |      |     |      |     |     |
|----|-------|---|----|---|-----|-----|----|----|----|------|-----|------|-----|-----|
| 22 | 51-55 | M | 9  | 1 | 42  | 13  | 47 | 10 | 79 | 2000 | 553 | 72   | 69  | MRI |
| 23 | 61-65 | M | 14 | 1 | n/a | n/a | 28 | 15 | 46 | 1450 | 900 | 38   | 76  | MRI |
| 24 | 61-65 | F | 7  | 1 | n/a | n/a | 53 | 19 | 64 | 2050 | 600 | 71   | 30  | MRI |
| 25 | 61-65 | F | 8  | 1 | n/a | n/a | 46 | 28 | 39 | 700  | 200 | 71   | 71  | MRI |
| 26 | 61-65 | M | 7  | 1 | 21  | 12  | 28 | 13 | 54 | 1125 | 890 | 21   | 43  | MRI |
| 27 | 51-55 | M | 14 | 1 | n/a | n/a | 53 | 23 | 57 | 600  | 0   | 100  | 44  | MRI |
| 28 | 56-60 | F | 16 | 1 | n/a | n/a | 26 | 13 | 50 | 900  | 300 | 67   | 65  | MRI |
| 29 | 51-55 | M | 16 | 2 | 48  | 18  | 53 | 17 | 68 | 2438 | 423 | 83   | 63  | MRI |
| 30 | 56-60 | M | 13 | 1 | n/a | n/a | 59 | 14 | 76 | 1150 | 75  | 93   | 50  | MRI |
| 31 | 51-55 | F | 6  | 1 | 43  | 10  | 42 | 35 | 17 | 930  | n/a | n/a  | 77  | MRI |
| 32 | 56-60 | M | 9  | 1 | n/a | n/a | 65 | 21 | 68 | 950  | 700 | 26   | 50  | MRI |
| 33 | 56-60 | M | 10 | 1 | n/a | n/a | 24 | 19 | 21 | 800  | 800 | 0    | n/a | MRI |
| 34 | 56-60 | F | 10 | 1 | n/a | n/a | 42 | 13 | 69 | 700  | 200 | 71   | 64  | MRI |
| 35 | 66-70 | M | 21 | 1 | 29  | 8   | 57 | 36 | 37 | 850  | 300 | 65   | 72  | MRI |
| 36 | 41-45 | M | 5  | 1 | n/a | n/a | 47 | 17 | 64 | 500  | 0   | 100  | 62  | MRI |
| 37 | 46-50 | F | 12 | 1 | n/a | n/a | 36 | 14 | 61 | 683  | 150 | 78   | n/a | MRI |
| 38 | 46-50 | F | 8  | 1 | n/a | n/a | 29 | 18 | 38 | 1400 | 0   | 100  | 52  | MRI |
| 39 | 56-60 | M | 7  | 1 | n/a | n/a | 21 | 9  | 57 | 333  | 50  | 85   | n/a | CT  |
| 40 | 51-55 | M | 14 | 2 | 42  | n/a | 44 | 11 | 75 | 875  | 200 | 77   | n/a | MRI |
| 41 | 66-70 | M | 15 | 1 | 28  | 11  | 25 | 7  | 72 | 1328 | 360 | 73   | 61  | CT  |
| 42 | 61-65 | M | 10 | 1 | 34  | 14  | 33 | 11 | 67 | 1100 | 720 | 35   | 59  | MRI |
| 43 | 66-70 | M | 17 | 2 | 60  | 21  | 71 | 40 | 44 | 1453 | n/a | n/a  | 65  | MRI |
| 44 | 51-55 | F | 9  | 1 | n/a | n/a | 67 | 39 | 42 | 1200 | 375 | 69   | n/a | MRI |
| 45 | 41-55 | F | 12 | 2 | n/a | n/a | 40 | 27 | 33 | 1025 | 500 | 51   | 53  | MRI |
| 46 | 61-65 | M | 16 | 1 | n/a | n/a | 39 | 30 | 23 | 500  | 650 | -30  | 31  | CT  |
| 47 | 51-55 | M | 11 | 1 | n/a | n/a | 32 | 10 | 69 | 400  | 0   | 100  | 32  | MRI |
| 48 | 61-65 | F | 10 | 1 | 37  | 12  | 35 | 26 | 26 | 945  | 688 | 27   | 68  | MRI |
| 49 | 71-75 | M | 6  | 2 | 18  | 16  | 33 | 21 | 36 | 400  | 800 | -100 | 11  | MRI |
| 50 | 51-55 | F | 5  | 1 | n/a | n/a | 45 | 13 | 71 | 750  | 50  | 93   | 25  | MRI |



|                          |       |   |    |   |    |    |    |    |     |      |      |     |    |     |
|--------------------------|-------|---|----|---|----|----|----|----|-----|------|------|-----|----|-----|
| 51                       | 51-55 | M | 6  | 3 | 13 | 7  | 18 | 20 | -11 | 515  | 600  | -17 | 46 | MRI |
| <b>WÜRZBURG (N = 43)</b> |       |   |    |   |    |    |    |    |     |      |      |     |    |     |
| 1                        | 51-55 | M | 13 | 1 | 78 | 46 | 78 | 36 | 54  | 1280 | 380  | 70  | 41 | CT  |
| 2                        | 56-60 | M | 13 | 1 | 53 | 25 | 53 | 28 | 47  | 1700 | 0    | 100 | 53 | CT  |
| 3                        | 56-60 | M | 20 | 1 | 43 | 12 | 43 | 15 | 65  | 2400 | 300  | 88  | 72 | CT  |
| 4                        | 66-70 | M | 16 | 1 | 49 | 18 | 49 | 30 | 39  | 1333 | 300  | 77  | 63 | CT  |
| 5                        | 46-50 | F | 21 | 1 | 36 | 3  | 36 | 33 | 8   | 1650 | 200  | 88  | 92 | CT  |
| 6                        | 56-60 | F | 15 | 1 | 43 | 13 | 43 | 25 | 42  | 1000 | 450  | 55  | 70 | CT  |
| 7                        | 61-65 | M | 15 | 1 | 43 | 8  | 43 | 23 | 47  | 1400 | 700  | 50  | 81 | CT  |
| 8                        | 66-70 | M | 16 | 1 | 55 | 21 | 55 | 40 | 27  | 2000 | 1050 | 48  | 62 | CT  |
| 9                        | 51-55 | M | 6  | 1 | 56 | 30 | 56 | 38 | 32  | 1275 | 850  | 33  | 46 | CT  |
| 10                       | 61-65 | F | 9  | 1 | 56 | 15 | 56 | 40 | 29  | 1800 | 700  | 61  | 73 | CT  |
| 11                       | 46-50 | F | 10 | 1 | 73 | 39 | 73 | 22 | 70  | 290  | 0    | 100 | 47 | CT  |
| 12                       | 66-70 | M | 13 | 1 | 71 | 36 | 71 | 40 | 44  | 1600 | 800  | 50  | 49 | CT  |
| 13                       | 66-70 | F | 12 | 1 | 47 | 14 | 47 | 14 | 70  | 1100 | 200  | 82  | 70 | CT  |
| 14                       | 61-65 | F | 12 | 1 | 31 | 10 | 31 | 36 | -16 | 1450 | 950  | 34  | 68 | CT  |
| 15                       | 56-60 | F | 15 | 1 | 50 | 15 | 50 | 26 | 48  | 650  | 350  | 46  | 70 | CT  |
| 16                       | 71-75 | F | 17 | 1 | 59 | 15 | 59 | 14 | 76  | 1400 | 500  | 64  | 75 | CT  |
| 17                       | 46-50 | M | 23 | 1 | 52 | 29 | 52 | 12 | 77  | 1100 | 100  | 91  | 44 | CT  |
| 18                       | 56-60 | M | 6  | 1 | 43 | 10 | 43 | 13 | 70  | 2350 | 950  | 60  | 77 | CT  |
| 19                       | 66-70 | F | 14 | 1 | 60 | 19 | 60 | 17 | 72  | 500  | 300  | 40  | 68 | CT  |
| 20                       | 61-65 | M | 9  | 1 | 87 | 18 | 67 | 27 | 60  | 2000 | 950  | 53  | 79 | CT  |
| 21                       | 61-65 | M | 10 | 1 | 29 | 14 | 29 | 32 | -10 | 1350 | 900  | 33  | 52 | CT  |
| 22                       | 51-55 | F | 6  | 1 | 47 | 18 | 47 | 20 | 57  | 2850 | 250  | 91  | 62 | CT  |
| 23                       | 56-60 | M | 18 | 1 | 40 | 10 | 40 | 31 | 23  | 1700 | 900  | 47  | 75 | CT  |
| 24                       | 66-70 | M | 14 | 1 | 51 | 38 | 51 | 23 | 55  | 1100 | 450  | 59  | 25 | CT  |
| 25                       | 51-55 | M | 5  | 1 | 26 | 3  | 26 | 5  | 81  | 650  | 400  | 38  | 88 | CT  |
| 26                       | 46-50 | M | 11 | 1 | 46 | 11 | 46 | 17 | 63  | 1100 | 200  | 82  | 76 | CT  |

|    |       |   |    |   |    |    |    |    |    |      |      |     |    |    |
|----|-------|---|----|---|----|----|----|----|----|------|------|-----|----|----|
| 27 | 56-60 | M | 11 | 1 | 43 | 24 | 43 | 22 | 49 | 1000 | 150  | 85  | 44 | CT |
| 28 | 51-55 | M | 19 | 1 | 50 | 11 | 50 | 15 | 70 | 1800 | 600  | 67  | 78 | CT |
| 29 | 51-55 | M | 10 | 1 | 69 | 14 | 69 | 25 | 64 | 2600 | 550  | 79  | 80 | CT |
| 30 | 51-55 | F | 11 | 1 | 55 | 4  | 55 | 14 | 75 | 1320 | 980  | 26  | 93 | CT |
| 31 | 71-75 | M | 18 | 1 | 57 | 16 | 57 | 29 | 49 | 2020 | 688  | 66  | 72 | CT |
| 32 | 46-50 | M | 21 | 1 | 64 | 41 | 64 | 48 | 25 | 2320 | 813  | 65  | 36 | CT |
| 33 | 71-75 | M | 13 | 1 | 44 | 16 | 44 | 45 | -2 | 1680 | 1640 | 2   | 64 | CT |
| 34 | 66-70 | F | 6  | 1 | 64 | 31 | 64 | 23 | 64 | 1033 | 460  | 55  | 52 | CT |
| 35 | 71-75 | M | 9  | 1 | 38 | 35 | 38 | 7  | 82 | 270  | 0    | 100 | 8  | CT |
| 36 | 61-65 | M | 11 | 3 | 38 | 22 | 38 | 19 | 50 | 988  | 105  | 89  | 42 | CT |
| 37 | 66-70 | M | 11 | 1 | 40 | 18 | 40 | 24 | 40 | 2040 | 1880 | 8   | 55 | CT |
| 38 | 46-50 | M | 13 | 1 | 44 | 23 | 44 | 24 | 45 | 1300 | 800  | 38  | 48 | CT |
| 39 | 46-50 | M | 9  | 1 | 37 | 22 | 37 | 22 | 41 | 1000 | 413  | 59  | 41 | CT |
| 40 | 61-65 | M | 10 | 1 | 67 | 18 | 67 | 39 | 42 | 2395 | 832  | 65  | 73 | CT |
| 41 | 61-65 | M | 9  | 1 | 52 | 23 | 52 | 19 | 63 | 916  | 733  | 20  | 56 | CT |
| 42 | 66-70 | M | 7  | 1 | 46 | 26 | 46 | 7  | 85 | 1020 | 443  | 57  | 43 | CT |
| 43 | 66-70 | M | 12 | 1 | 31 | 2  | 31 | 13 | 58 | 1068 | 0    | 100 | 94 | CT |

Notes: \*Classification into Parkinson's disease (PD) phenotypes according to Schiess (2000)<sup>15</sup>: 1= axial-rigid type. 2 = Mixed type, 3 = tremor dominant type. Abbreviations: CT, computed tomography; F, female; LEDD, levodopa equivalent daily dosage; M, male; Mo., months; MRI, magnetic resonance imaging; Nr., number; postop., postoperative; preop., preoperative; STIM, stimulation; UPDRS III, Unified Parkinson's Disease Rating Scale – Part III.

**Table S5:** Patient-wise demographic and clinical characteristics of the obsessive-compulsive disorder cohorts.

| GRENOBLE (N = 13) |                                         |     |                                     |                 |                                |                                     |                     |                                                                          |                          |
|-------------------|-----------------------------------------|-----|-------------------------------------|-----------------|--------------------------------|-------------------------------------|---------------------|--------------------------------------------------------------------------|--------------------------|
| Patient Nr.       | Age at Surgery (within range, in years) | Sex | Disease Duration at Surgery (years) | Y-BOCS Baseline | Y-BOCS at 12 Mo. after Surgery | Percent Reduction from Baseline (%) | OCD Subtype         | Comorbidities                                                            | Postop. Imaging Modality |
| 1                 | 31-35                                   | M   | 13                                  | 32              | 26                             | 19                                  | checking, repeating | none                                                                     | MRI                      |
| 2                 | 36-40                                   | M   | 17                                  | 32              | 28                             | 13                                  | washing, ordering   | anankastic personality                                                   | MRI                      |
| 3                 | 36-40                                   | F   | 18                                  | 25              | 12                             | 52                                  | washing             | none                                                                     | MRI                      |
| 4                 | 26-30                                   | F   | 24                                  | 34              | 30                             | 12                                  | checking            | skin picking, hypothyroidia                                              | MRI                      |
| 5                 | 51-55                                   | F   | 25                                  | 40              | 16                             | 60                                  | washing             | none                                                                     | MRI                      |
| 6                 | 41-45                                   | M   | 26                                  | 33              | 32                             | 3                                   | checking, hoarding  | social phobia                                                            | MRI                      |
| 7                 | 51-55                                   | F   | 22                                  | 33              | 2                              | 94                                  | checking            | depression, Minkowski-Chauffard syndrome                                 | MRI                      |
| 8                 | 36-40                                   | F   | 11                                  | 36              | 6                              | 83                                  | washing             | none                                                                     | MRI                      |
| 9                 | 26-30                                   | M   | 10                                  | 38              | 22                             | 42                                  | checking, washing   | hypersomnia                                                              | CT                       |
| 10                | 46-50                                   | F   | 39                                  | 35              | 25                             | 29                                  | checking            | None                                                                     | CT                       |
| 11                | 36-40                                   | F   | 15                                  | 36              | 30                             | 17                                  | washing             | history of eating disorder, history of one seizure, alcoholism, pruritus | MRI                      |
| 12                | 36-40                                   | F   | 5                                   | 32              | 3                              | 91                                  | checking            | none                                                                     | MRI                      |
| 13                | 31-35                                   | F   | 21                                  | 30              | 14                             | 53                                  | checking            | dermatillomania                                                          | CT                       |
| LONDON (N = 6)    |                                         |     |                                     |                 |                                |                                     |                     |                                                                          |                          |
| Patient Nr.       | Age at Surgery (within range, in years) | Sex | Disease Duration at Surgery (years) | Y-BOCS Baseline | Y-BOCS after amSTN Phase       | Percent Reduction from Baseline (%) | OCD Subtype         | Comorbidities                                                            | Postop. Imaging Modality |
| 1                 | 36-40                                   | F   | 22                                  | 38              | 32* at 6 mo.                   | 16                                  | n/a                 | n/a                                                                      | MRI                      |
| 2                 | 36-40                                   | M   | 22                                  | 34              | 26 at 6 mo.                    | 23                                  | n/a                 | n/a                                                                      | MRI                      |
| 3                 | 61-65                                   | M   | 30                                  | 37              | 17 at 6 mo.                    | 55                                  | n/a                 | n/a                                                                      | MRI                      |
| 4                 | 36-40                                   | M   | 20                                  | 38              | 20 at 3 mo.                    | 47                                  | n/a                 | n/a                                                                      | MRI                      |
| 5                 | 51-55                                   | M   | 23                                  | 34              | 23 at 3 mo.                    | 32                                  | n/a                 | n/a                                                                      | MRI                      |
| 6                 | 41-45                                   | M   | 28                                  | 36              | 1 at 3 mo.                     | 97                                  | n/a                 | n/a                                                                      | MRI                      |

Notes: \* This score is last entry carried forward. Abbreviations: amSTN, anteromedial subthalamic nucleus; CT, computed tomography; F, female; M, male; mo., months; MRI, magnetic resonance imaging; Nr., number; OCD, obsessive-compulsive disorder; postop., postoperative; Y-BOCS, Yale-Brown Obsessive-Compulsive Scale.

**Table S6:** Peak voxel coordinates of disease-specific cortical sweet tract projection sites and subthalamic sweet spots.

|                                                         |       | DYT     |        |        | TS      |        |        | PD      |        |        | OCD     |        |         |
|---------------------------------------------------------|-------|---------|--------|--------|---------|--------|--------|---------|--------|--------|---------|--------|---------|
|                                                         |       | (x)     | y      | z)     | (x)     | y      | z)     | (x)     | y      | z)     | (x)     | y      | z)      |
| <b>Cortical sweet tract projection sites</b><br>(in mm) | Left  | (-11.00 | -25.00 | 76.00) | (-9.50  | -14.00 | 74.00) | (-10.00 | -3.00  | 72.00) | (-50.00 | 36.00  | -2.50)  |
|                                                         | Right | (21.00  | -20.50 | 74.00) | (13.00  | -5.50  | 72.00) | (14.00  | -4.00  | 72.00) | (40.50  | 48.00  | -12.50) |
| <b>Subthalamic sweet spots</b><br>(in mm)               | Left  | (-14.72 | -14.38 | -4.10) | (-12.96 | -11.08 | -6.30) | (-12.08 | -13.94 | -6.74) | (-8.78  | -11.52 | -9.60)  |
|                                                         | Right | (14.54  | -13.50 | -4.30) | (13.00  | -9.98  | -6.08) | (11.90  | -13.28 | -6.74) | (8.38   | -10.86 | -9.38)  |

*Abbreviations:* DYT, dystonia; mm, millimeters; OCD, obsessive-compulsive disorder; PD, Parkinson's disease; TS, Tourette's syndrome.

**Table S7:** Degree of spatial scaling of functionally selective cortical points by the subthalamic nucleus.

|                                                                                | OCD-PD | PD-TS | TS-DYT | OCD-TS | PD-DYT | OCD-DYT |
|--------------------------------------------------------------------------------|--------|-------|--------|--------|--------|---------|
| <b>CORTEX</b><br>(mean distances across hemispheres, in mm)                    | 97.91  | 6.50  | 14.20  | 101.84 | 20.21  | 109.42  |
| <b>SUBCORTEX</b><br>(mean distances across hemispheres, in mm)                 | 5.01   | 3.28  | 4.28   | 5.54   | 3.67   | 8.49    |
| <b>CORTEX/SUBCORTEX</b><br>(ratio of mean distances across hemispheres, in mm) | 19.55  | 1.98  | 3.32   | 18.37  | 5.50   | 12.89   |

*Notes. Abbreviations:* DYT, dystonia; mm, millimeters; OCD, obsessive-compulsive disorder; PD, Parkinson's disease; TS, Tourette's syndrome.

## References

1. Burke, R. E. *et al.* Validity and reliability of a rating scale for the primary torsion dystonias. *Neurology* **35**, 73–77 (1985).
2. Goetz, C. G. *et al.* Movement disorder society-sponsored revision of the unified Parkinson's disease rating scale (MDS-UPDRS): Process, format, and clinimetric testing plan. *Mov. Disord.* **22**, 41–47 (2007).
3. Leckman, J. F. *et al.* The Yale Global Tic Severity Scale: Initial testing of a clinician-rated scale of tic severity. *J. Am. Acad. Child Adolesc. Psychiatry* **28**, 566–573 (1989).
4. Goodman, W. K. *et al.* The Yale-Brown Obsessive Compulsive Scale: I. Development, use, and reliability. *Arch. Gen. Psychiatry* **46**, 1006–1011 (1989).
5. Ostrem, J. L. *et al.* Subthalamic nucleus deep brain stimulation in primary cervical dystonia. *Neurology* **76**, 870–878 (2011).
6. Ostrem, J. L. *et al.* Subthalamic nucleus deep brain stimulation in isolated dystonia: A 3-year follow-up study. *Neurology* **88**, 25–35 (2016).
7. Lin, S. *et al.* Deep brain stimulation of the globus pallidus internus versus the subthalamic nucleus in isolated dystonia. *J. Neurosurg.* **132**, 721–732 (2019).
8. He, W. *et al.* Weight change after subthalamic nucleus deep brain stimulation in patients with isolated dystonia. *Front. Neurol.* **12**, 1–8 (2021).
9. Horn, A. *et al.* Connectivity predicts deep brain stimulation outcome in Parkinson's disease. *Ann. Neurol.* **82**, 67–78 (2017).
10. Horn, A. *et al.* Deep brain stimulation induced normalization of the human functional connectome in Parkinson's disease. *Brain* **142**, 3129–3143 (2019).
11. Vissani, M. *et al.* Spatio-temporal structure of single neuron subthalamic activity identifies DBS target for anesthetized Tourette Syndrome patients. *J. Neural Eng.* **16**, 066011 (2019).
12. Dai, L. *et al.* Subthalamic deep brain stimulation for refractory Gilles de la Tourette's syndrome: Clinical outcome and functional connectivity. *J. Neurol.* **269**, 6116–6126 (2022).
13. Tyagi, H. *et al.* A randomized trial directly comparing ventral capsule and anteromedial subthalamic nucleus stimulation in obsessive-compulsive disorder: Clinical and imaging evidence for dissociable effects. *Biol. Psychiatry* **85**, 726–734 (2019).
14. Polosan, M. *et al.* Affective modulation of the associative-limbic subthalamic nucleus: deep brain stimulation in obsessive-compulsive disorder. *Transl. Psychiatry* **9**, (2019).
15. Schiess, M. C., Zheng, H., Soukup, V. M., Bonnen, J. G. & Nauta, H. J. W. Parkinson's disease subtypes: Clinical classification and ventricular cerebrospinal fluid analysis. *Park. Relat. Disord.* **6**, 69–76 (2000).
